# Supplementary material
Source: PubMed Central journal article supplement (PMC10786410)
Supplement: NIHMS1949984-supplement-Supplement.pdf [file NIHMS1949984-supplement-Supplement.pdf]

**A SIMPLE, CONSISTENT ESTIMATOR OF SNP  
HERITABILITY FROM GENOME-WIDE ASSOCIATION  
STUDIES: SUPPLEMENTARY MATERIAL**

BY ARMIN SCHWARTZMAN<sup>\*</sup>, ANDREW J. SCHORK<sup>†</sup>, RONG  
ZABLOCKI<sup>\*</sup> AND WESLEY K. THOMPSON<sup>\*,†</sup>

<sup>\*</sup>*University of California, San Diego, La Jolla, CA and*

<sup>†</sup>*Institute of Biological Psychiatry, Mental Health Center St. Hans, Mental  
Health Services Copenhagen, Roskilde, Denmark*

**S1. Shorter derivations and proofs.**

DERIVATION OF THE DICKER ESTIMATOR (8). Written in our notation, Dicker (Dicker, 2014, Section 4.1) proposes the estimators

$$\begin{aligned}\hat{\sigma}^2 &= \frac{m+n}{n(n-1)} \|\mathbf{y}\|^2 - \frac{1}{n(n-1)} \|\hat{\Sigma}^{-1/2} \mathbf{X}^T \mathbf{y}\|^2, \\ \hat{\tau}^2 &= -\frac{m}{n(n-1)} \|\mathbf{y}\|^2 + \frac{1}{n(n-1)} \|\hat{\Sigma}^{-1/2} \mathbf{X}^T \mathbf{y}\|^2,\end{aligned}$$

where  $n$  has been replaced by  $n-1$  due to the centering of  $\mathbf{y}$  and  $\mathbf{X}$ . The estimator (8) is obtained as the fraction  $\hat{h}_I^2 = \hat{\tau}^2 / (\hat{\sigma}^2 + \hat{\tau}^2)$ .  $\square$

DERIVATION OF THE DICKER ESTIMATOR (10). Written in our notation, Dicker (Dicker, 2014, Section 4.2) proposes the estimators

$$\begin{aligned}\tilde{\sigma}^2 &= \left(1 + \frac{m\hat{m}_1^2}{n\hat{m}_2}\right) \frac{1}{n-1} \|\mathbf{y}\|^2 - \frac{\hat{m}_1}{n(n-1)\hat{m}_2} \|\mathbf{X}^T \mathbf{y}\|^2, \\ \tilde{\tau}^2 &= -\frac{m\hat{m}_1^2}{n(n-1)\hat{m}_2} \|\mathbf{y}\|^2 + \frac{\hat{m}_1}{n(n-1)\hat{m}_2} \|\mathbf{X}^T \mathbf{y}\|^2,\end{aligned}$$

where  $n$  has been replaced by  $n-1$  due to the centering of  $\mathbf{y}$  and  $\mathbf{X}$ . The estimator (10) is obtained as the fraction  $\hat{h}_{II}^2 = \tilde{\tau}^2 / (\tilde{\sigma}^2 + \tilde{\tau}^2)$ .  $\square$

PROOF OF PROPOSITION 1. From (25), using (19) and (20),

$$\sum_{k=1}^K \frac{\hat{\mu}_{2,k}}{\hat{\mu}_2} \hat{h}_{\text{GWASH},k}^2 = \sum_{k=1}^K \frac{m_k}{n\hat{\mu}_2} (s_k^2 - 1) = \frac{1}{n\hat{\mu}_2} \sum_{j \in J} (u_j^2 - 1) = \hat{h}_{\text{GWASH}}^2.$$

To show (28), using (21) and the second expression in (26),

$$\begin{aligned} \sum_{k=1}^K \frac{m_k}{m} \hat{\mu}_{2,k} &= 1 + \frac{1}{m} \sum_{k=1}^K \sum_{i \neq j \in J_k} \left[ \left( \tilde{S}_{ij}^{(k)} \right)^2 - \frac{1}{n-1} \right] \\ &= 1 + \frac{1}{m} \sum_{i \neq j \in J} \left[ \tilde{S}_{ij}^2 - \frac{1}{n-1} \right] + o\left(\frac{1}{n}\right) = \hat{\mu}_2 + o\left(\frac{1}{n}\right). \end{aligned}$$

The second equality is due to independence between sets; in this case the squared cross-correlation terms between sets average approximately  $1/(n-1)$  and so the overall average contribution of the cross-terms between sets to  $\hat{\mu}_2$  is of smaller order.  $\square$

PROOF OF PROPOSITION 2. From (6) and (7),

$$(n-2)\hat{\sigma}_j^2 = \|\mathbf{y}\|^2 - \|\mathbf{x}_j\|^2 \hat{\beta}_j^2 = \|\mathbf{y}\|^2 - \hat{\sigma}_j^2 t_j^2,$$

so  $\|\mathbf{y}\|^2 = \hat{\sigma}_j^2 (t_j^2 + n - 2)$ . Thus, using (5) and again (7), we can write

$$u_j^2 = (n-1) \left( \frac{\mathbf{x}_j^\top \mathbf{y}}{\|\mathbf{x}_j\| \|\mathbf{y}\|} \right)^2 = (n-1) \frac{\|\mathbf{x}_j\|^2 \hat{\beta}_j^2}{\|\mathbf{y}\|^2} = (n-1) \frac{\|\mathbf{x}_j\|^2 \hat{\beta}_j^2}{\hat{\sigma}_j^2 (t_j^2 + n - 2)} = (n-1) \frac{t_j^2}{t_j^2 + n - 2}$$

and the result follows.  $\square$

## S2. Supporting lemmas for the proof of Theorem 1.

PROOF OF LEMMA 1. Any two sample correlations  $\tilde{S}_{jk}$  and  $\tilde{S}_{lh}$  are asymptotically bivariate normal with means  $\tilde{\Sigma}_{jk}$  and  $\tilde{\Sigma}_{lh}$ , and variances  $(1 - \tilde{\Sigma}_{jk}^2)^2/n$  and  $(1 - \tilde{\Sigma}_{lh}^2)^2/n$ . The covariance  $\text{Cov}(\tilde{S}_{jk}, \tilde{S}_{lh})$ , whose expression is given by ?, is a polynomial of order 4 in  $\tilde{\Sigma}_{jk}$  and  $\tilde{\Sigma}_{lh}$  and proportional to  $1/n$ . From the asymptotic normality, we may write

$$\begin{aligned} \text{(S1)} \quad \mathbb{E}(\tilde{S}_{jk}^2) &= \tilde{\Sigma}_{jk}^2 + \frac{(1 - \tilde{\Sigma}_{jk}^2)^2}{n} + o\left(\frac{1}{n}\right), \\ \text{Cov}(\tilde{S}_{jk}^2, \tilde{S}_{lh}^2) &= 2 \left[ \text{Cov}(\tilde{S}_{jk}, \tilde{S}_{lh}) \right]^2 + o\left(\frac{1}{n}\right) = O\left(\frac{1}{n^2}\right). \end{aligned}$$

Now, from (21) and (S1),

$$\begin{aligned} \mathbb{E}(\hat{\mu}_2) &= 1 + \frac{1}{m} \sum_{j \neq k} \left[ \mathbb{E}(\tilde{S}_{jk}^2) - \frac{1}{n-1} \right] = 1 + \frac{1}{m} \sum_{j \neq k} \left[ \tilde{\Sigma}_{jk}^2 - \frac{2\tilde{\Sigma}_{jk}^2 - \tilde{\Sigma}_{jk}^4}{n} + o\left(\frac{1}{n}\right) \right] \\ &= \mu_2 - \frac{1}{m} \sum_{j \neq k} \left[ \frac{2\tilde{\Sigma}_{jk}^2 - \tilde{\Sigma}_{jk}^4}{n} + o\left(\frac{1}{n}\right) \right] = \mu_2 + O\left(\frac{1}{n}\right), \end{aligned}$$

since the spectral moments of  $\tilde{\Sigma}$  up to order 4 are assumed bounded by Assumption 1. Furthermore,

$$\text{Var}(\hat{\mu}_2) = \frac{1}{m^2} \sum_{j \neq k} \sum_{l \neq h} \text{Cov}(\tilde{S}_{jk}^2, \tilde{S}_{lh}^2) = O\left(\frac{1}{n^2}\right),$$

again because the spectral moments of  $\tilde{\Sigma}$  up to order 4 are bounded. Thus,

$$\text{E}(\hat{\mu}_2 - \mu_2)^2 = \text{Var}(\hat{\mu}_2) + [\text{E}(\hat{\mu}_2) - \mu_2]^2 = O\left(\frac{1}{n^2}\right),$$

implying (22).  $\square$

LEMMA 2. Let  $\mathbf{D} = \text{Diag}(\mathbf{S})$  and  $\mathbf{\Delta} = \text{Diag}(\mathbf{\Sigma})$ . Under Assumption 1:

$$\begin{aligned} (i) \quad & \frac{1}{m} \|\mathbf{\Delta}^{-1} \mathbf{D} - \mathbf{I}\|^2 = \frac{2}{n} + O_P\left(\frac{1}{n\sqrt{m}}\right), \\ (ii) \quad & \frac{1}{m} \|\mathbf{\Delta}^{-1} \mathbf{D}\|^2 - 1 = \frac{2}{n} + O_P\left(\frac{1}{n\sqrt{m}}\right). \end{aligned}$$

PROOF. For the purpose of simplicity of the proof, assume that the columns of  $\mathbf{X}$  have not been centered so that the rows of  $\mathbf{X}$  are independent. This makes no difference asymptotically, only changing the number of degrees of freedom  $n - 1$  to  $n$ . Let  $W_j = \|\mathbf{x}_j\|^2 / [n\Sigma_{jj}]$  be the  $j$ -th diagonal entry of  $\mathbf{\Delta}^{-1} \mathbf{D}$  where  $\Sigma_{jj}$  is the  $j$ -th diagonal entry of  $\mathbf{\Sigma}$  (or  $\mathbf{\Delta}$ ). Then  $W_j \sim \chi_n^2/n$  has mean 1 and variance  $2/n$ .

(i) The expectation of  $\|\mathbf{\Delta}^{-1} \mathbf{D} - \mathbf{I}\|^2/m = \sum_{j=1}^m (W_j - 1)^2/m$  is equal to  $\text{Var}(W_j) = 2/n$ . Its variance is

$$\begin{aligned} \text{Var}\left\{\frac{1}{m} \|\mathbf{\Delta}^{-1} \mathbf{D} - \mathbf{I}\|^2\right\} &= \frac{1}{m^2} \sum_{j,k} \text{Cov}[(W_j - 1)^2, (W_k - 1)^2] \\ &= \frac{1}{m^2} \sum_{j,k} \text{Cov}\left[\left(\frac{1}{n} \sum_{i=1}^n \frac{x_{ij}^2}{\Sigma_{jj}} - 1\right)^2, \left(\frac{1}{n} \sum_{\ell=1}^n \frac{x_{\ell k}^2}{\Sigma_{kk}} - 1\right)^2\right] \\ &= \frac{1}{m^2 n^4} \sum_{j,k} \left\{ \sum_{i,g,\ell,h} \text{Cov}\left[\left(\frac{x_{ij}^2}{\Sigma_{jj}} - 1\right) \left(\frac{x_{gj}^2}{\Sigma_{jj}} - 1\right), \left(\frac{x_{\ell k}^2}{\Sigma_{kk}} - 1\right) \left(\frac{x_{hk}^2}{\Sigma_{kk}} - 1\right)\right] \right\}. \end{aligned}$$

Since the rows of  $\mathbf{X}$  are independent, most terms in the inner sum vanish except for the cases  $i = g = \ell = h$ , where the inner covariance is  $8\tilde{\Sigma}_{jk}^2(3\tilde{\Sigma}_{jk}^2 + 4)$  (and  $\tilde{\Sigma}_{jk}$  is the  $(j, k)$  entry of  $\tilde{\Sigma}$ ), and the terms  $i = \ell \neq g = h$  and

$i = h \neq g = \ell$ , where the inner covariance is  $4\tilde{\Sigma}_{jk}^4$ . Here we have used the fact that within any row  $i$  of  $\mathbf{X}$ ,

$$\begin{aligned}\text{Cov}(\Sigma_{jj}^{-1}x_{ij}^2, \Sigma_{kk}^{-1}x_{ik}^2) &= 2\tilde{\Sigma}_{jk}^2, \\ \text{Cov}(\Sigma_{jj}^{-2}x_{ij}^4, \Sigma_{kk}^{-1}x_{ik}^2) &= 12\tilde{\Sigma}_{jk}^2, \\ \text{Cov}(\Sigma_{jj}^{-2}x_{ij}^4, \Sigma_{kk}^{-2}x_{ik}^4) &= 24\tilde{\Sigma}_{jk}^2(\tilde{\Sigma}_{jk}^2 + 3).\end{aligned}$$

Hence,

$$\text{Var} \left\{ \frac{1}{m} \|\Delta^{-1}\mathbf{D} - \mathbf{I}\|^2 \right\} = \frac{1}{m^2 n^4} \sum_{j,k} \left[ 2n(n-1) \cdot 4\tilde{\Sigma}_{jk}^4 + n \cdot 8\tilde{\Sigma}_{jk}^2(3\tilde{\Sigma}_{jk}^2 + 4) \right] = \frac{8}{mn^2} \mu_4 + O\left(\frac{1}{mn^3}\right),$$

where  $\sum_{j,k} \tilde{\Sigma}_{jk}^4/m \leq \text{tr}(\Sigma^4)/m = m_4$  is bounded by Assumption 1. This yields (i).

(ii) Write

$$\frac{1}{m} \|\Delta^{-1}\mathbf{D} - \mathbf{I}\|^2 = \frac{1}{m} \|\Delta^{-1}\mathbf{D}\|^2 - \frac{2}{m} \text{tr}(\Delta^{-1}\mathbf{D}) + \frac{1}{m} \|\mathbf{I}\|^2 = \frac{1}{m} \|\Delta^{-1}\mathbf{D}\|^2 - \frac{2}{m} \sum_{j=1}^m W_j + 1.$$

Thus  $\|\Delta^{-1}\mathbf{D}\|^2/m$  has expectation  $1 + 2/n$ . Similar to the proof of (ii), it can be shown that the variance is of the same order.  $\square$

**S3. Proof of Theorem 1.** Consider a situation where, instead of  $\mathbf{X}$ , the observed covariate matrix is  $\mathbf{Z} = \mathbf{X}\Delta^{-1/2}$  with  $\Delta = \text{Diag}(\Sigma)$ . The idea of the proof is to approximate the GWASH estimator (19) by an estimator based on  $\mathbf{Z}$ . This is done in two steps by: (1) establishing the asymptotic properties of the estimator based on  $\mathbf{Z}$ ; (2) establishing the asymptotic equivalence of the two estimators.

Let  $\|A\|^2 = \text{tr}(A^T A)$  denote the squared Frobenius norm of the matrix  $A$  and recall the Cauchy-Schwartz inequality  $\text{tr}(A^T B) \leq \|A\| \|B\|$ .

Step 1: Based on  $\mathbf{Z}$ , the full model (2) can be written as

$$(S2) \quad \mathbf{y} = \mathbf{Z}\tilde{\boldsymbol{\beta}} + \boldsymbol{\varepsilon},$$

where  $\tilde{\boldsymbol{\beta}} = \Delta^{1/2}\boldsymbol{\beta}$ . Note that  $\tau^2 = \boldsymbol{\beta}^T \Sigma \boldsymbol{\beta} = \tilde{\boldsymbol{\beta}}^T \tilde{\Sigma} \tilde{\boldsymbol{\beta}}$ , so the variance fraction (4) does not change. The matrix  $\mathbf{Z}$  has rows with covariance  $\tilde{\Sigma} = \Delta^{-1/2} \Sigma \Delta^{-1/2}$  and its sample covariance matrix is  $\mathbf{Z}^T \mathbf{Z} / (n-1) = \Delta^{-1/2} \mathbf{S} \Delta^{-1/2}$ . Following the form of Dicker's estimator (10) for unestimable covariance, the estimator of  $h^2$  based on  $\mathbf{Z}$  is

$$(S3) \quad \tilde{h}^2 = \frac{m\tilde{m}_1^2}{n\tilde{m}_2} \left( \frac{\|\mathbf{Z}^T \mathbf{y}\|^2}{m\tilde{m}_1 \|\mathbf{y}\|^2} - 1 \right) = \frac{m\tilde{m}_1^2}{n\tilde{m}_2} \left( \frac{\|\mathbf{Z}^T \tilde{\mathbf{y}}\|^2}{m\tilde{m}_1 (n-1)} - 1 \right),$$

where

(S4)

$$\tilde{m}_1 = \frac{1}{m} \text{tr}(\mathbf{\Delta}^{-1/2} \mathbf{S} \mathbf{\Delta}^{-1/2}), \quad \tilde{m}_2 = \frac{1}{m} \text{tr}[(\mathbf{\Delta}^{-1/2} \mathbf{S} \mathbf{\Delta}^{-1/2})^2] - \frac{m}{n-1} \tilde{m}_1^2.$$

Applying Proposition 2 of [Dicker \(2014\)](#) to the estimator (S3) gives that this estimator is asymptotically Gaussian with mean  $h^2$  and variance

$$(S5) \quad \frac{\tilde{\psi}^2}{n} = \frac{2}{n} \left( \frac{m\mu_1^2}{n\mu_2} + 2\frac{\mu_1\mu_3}{\mu_2^2} h^2 - h^4 \right),$$

where  $\mu_1 = 1$ ,  $\mu_2$  and  $\mu_3$ , given by (17), are the spectral moments of the covariance of  $\mathbf{Z}$ .

Step 2: To show that the GWASH estimator (19) is asymptotically equivalent to the estimator (S3) based on  $\mathbf{Z}$ , we need to approximate: (i)  $\|\tilde{\mathbf{X}}^T \tilde{\mathbf{y}}\|^2/m$  by  $\|\mathbf{Z}^T \tilde{\mathbf{y}}\|^2/m$ , and (ii)  $\hat{\mu}_1$  by  $\tilde{m}_1$  and  $\hat{\mu}_2$  by  $\tilde{m}_2$ .

(i) Let  $\mathbf{D} = \text{Diag}(\mathbf{S})$  so that  $\tilde{\mathbf{X}}^T = \mathbf{D}^{-1/2} \mathbf{X}^T = \mathbf{D}^{-1/2} \mathbf{\Delta}^{1/2} \mathbf{Z}^T$ . Define  $\mathbf{v} = \mathbf{Z}^T \tilde{\mathbf{y}}$ . We may write

$$\|\tilde{\mathbf{X}}^T \tilde{\mathbf{y}}\|^2 = \|\mathbf{D}^{-1/2} \mathbf{\Delta}^{1/2} \mathbf{Z}^T \tilde{\mathbf{y}}\|^2 = \mathbf{v}^T \mathbf{D}^{-1} \mathbf{\Delta} \mathbf{v},$$

so

$$\begin{aligned} \left| \|\tilde{\mathbf{X}}^T \tilde{\mathbf{y}}\|^2 - \|\mathbf{Z}^T \tilde{\mathbf{y}}\|^2 \right| &= \left| \mathbf{v}^T (\mathbf{D}^{-1} \mathbf{\Delta} - \mathbf{I}) \mathbf{v} \right| = \left| \text{tr} \left[ \mathbf{v} \mathbf{v}^T (\mathbf{D}^{-1} \mathbf{\Delta} - \mathbf{I}) \right] \right| \\ &\leq \|\mathbf{v} \mathbf{v}^T\| \|\mathbf{D}^{-1} \mathbf{\Delta} - \mathbf{I}\| = \|\mathbf{v}\|^2 \|\mathbf{D}^{-1} \mathbf{\Delta} - \mathbf{I}\|, \end{aligned}$$

where the bars around matrices denote the Frobenius norm and the inequality is due to the Cauchy-Schwarz inequality for the Frobenius norm. By Lemma 3,

$$\|\mathbf{D}^{-1} \mathbf{\Delta} - \mathbf{I}\| = \left[ \frac{1}{m} \|\mathbf{\Delta}^{-1} \mathbf{D}\|^2 \right]^{-1/2} \left[ \frac{1}{m} \|\mathbf{\Delta}^{-1} \mathbf{D} - \mathbf{I}\|^2 \right]^{1/2} = O_P \left( \frac{1}{\sqrt{n}} \right).$$

Thus

$$(S6) \quad \frac{1}{m} \|\tilde{\mathbf{X}}^T \tilde{\mathbf{y}}\|^2 = \frac{1}{m} \|\mathbf{Z}^T \tilde{\mathbf{y}}\|^2 \left( 1 + O_P \left( \frac{1}{\sqrt{n}} \right) \right).$$

(ii) As stated in the proof of Proposition 2 of [Dicker \(2014\)](#), applied to the estimator (S3) based on  $\mathbf{Z}$ , we have that

(S7)

$$\tilde{m}_1 = \mu_1 + O_P \left( \frac{1}{\sqrt{mn}} \right) = \hat{\mu}_1 + O_P \left( \frac{1}{\sqrt{mn}} \right), \quad \tilde{m}_2 = \mu_2 + O_P \left( \frac{1}{\sqrt{mn}} \right),$$

because  $\hat{\mu} = \mu_1 = 1$ . Furthermore, (22) together with (S7) imply

$$(S8) \quad \tilde{m}_2 = \hat{\mu}_2 + O_P\left(\frac{1}{n}\right)$$

because  $m/n$  converges to a constant.

Putting (S6), (S7) and (S8) together in (S3) and comparing to (18), we obtain that

$$\tilde{h}^2 = \hat{h}_{\text{GWASH}}^2 \left(1 + O_P\left(\frac{1}{\sqrt{n}}\right)\right).$$

Hence  $\hat{h}_{\text{GWASH}}^2$  has the same asymptotic distribution as  $\tilde{h}^2$ . Note that the variance (S5) is the same as (23).

**S4. Computationally efficient estimation of the third spectral moment  $\hat{\mu}_3$ .** As in Section 4.4, an approximation to  $\hat{\mu}_3$  can be obtained by only considering entries of  $\tilde{\mathbf{S}}$  close to the diagonal. Let  $\mathcal{I}_2$  and  $\mathcal{I}_3$  be respectively the set of index pairs  $(i, j)$ ,  $i \neq j$ , and index triplets  $(i, j, k)$  other than  $i = j = k$  to be included in this calculation. Then we have the modified estimator

$$(S9) \quad \hat{\mu}_{3, \mathcal{I}_3} = 1 + \frac{1}{m} \left[ \sum_{(i,j,k) \in \mathcal{I}_3} \tilde{S}_{ij} \tilde{S}_{jk} \tilde{S}_{ik} - 3 \frac{|\mathcal{I}_2|}{n-1} \hat{\mu}_2 - \frac{|\mathcal{I}_3|}{(n-1)^2} \right],$$

where  $|\mathcal{I}_2|$  and  $|\mathcal{I}_3|$  are the number of elements in the sets  $\mathcal{I}_2$  and  $\mathcal{I}_3$ , respectively.

Specifically, for a single chromosome with  $m_k$  markers, let  $\tilde{\mathbf{S}}_q$  be the restricted matrix (31) so that

$$\mathcal{I}_2 = \{(i, j) : 1 < |i - j| \leq q\},$$

$$\mathcal{I}_3 = \{(i, j, k) : 1 < |i - j| \leq q, 1 < |i - k| \leq q, 1 < |j - k| \leq q\}.$$

the number of elements  $|\mathcal{I}_2|$  and  $|\mathcal{I}_3|$  can be computed exactly as

$$|\mathcal{I}_2| = q(2m_k - q - 1)$$

$$|\mathcal{I}_3| = q(q - 1)(3m_k - 2q - 2).$$

Replacing in (S9) gives the formula

$$(S10) \quad \hat{\mu}_{3,q}^{(k)} = \frac{1}{m_k} \left[ \text{tr} \left( \tilde{\mathbf{S}}_q^{(k)} \right)^3 - 3 \frac{q(2m_k - q - 1)}{n - 1} \hat{\mu}_2 - \frac{q(q - 1)(3m_k - 2q - 2)}{(n - 1)^2} \right].$$

Note that the trace above can be computed using the property that for any squared matrix  $\mathbf{A}$ ,  $\text{tr}(\mathbf{A}^3) = \sum_{i,j} A_{ij}(\mathbf{A}^2)_{ij}$ .

Again, for  $K$  chromosomes, the overall estimate  $\hat{\mu}_{3,q}$  is the weighted average of the per-chromosome estimates (32), weighted by the number of markers  $m_k$  in each chromosome.

### S5. Derivations related to LDSC regression.

DERIVATION OF THE LDSC REGRESSION EQUATION (35). In our notation, the chi-squared statistics defined in Section 1.2 of the Supplementary Note to ? can be written as  $\chi_j^2 = n(\tilde{\mathbf{x}}_j^T \tilde{\mathbf{y}}/n)^2$ , because both the predictors and the response in ? are assumed standardized. Using (15), we can write  $\chi_j^2 = u_j^2(n-1)/n \approx u_j^2$  for large  $n$ . Then Eq. (1.3) in ? becomes

$$(S11) \quad \mathbb{E}[u_j^2 \mid \ell_j] \approx h^2 \frac{n}{m} \ell_j + 1, \quad j = 1, \dots, m,$$

where  $\ell_j = \sum_{k=1}^m r_{jk}^2$  and  $r_{jk} = \mathbb{E}[\tilde{\mathbf{x}}_j^T \tilde{\mathbf{x}}_k/n]$ . However, the Online Methods section in ? explains that the empirical LD-scores are biased and cannot be used directly in (S11). Instead, they use the adjusted LD-scores

$$\ell_{j,\text{adj}} = \sum_{k=1}^m r_{jk,\text{adj}}^2 = \sum_{k=1}^m \left( \tilde{r}_{jk}^2 - \frac{1 - \tilde{r}_{jk}^2}{n-1} \right) = \hat{\ell}_j - \frac{m - \hat{\ell}_j}{n-1},$$

where  $\hat{\ell}_j = \sum_{k=1}^m \tilde{r}_{jk}^2$  and we have used  $n-1$  in the adjustment instead of  $n-2$  to reflect the fact that the relevant LD-regression fit in our case uses a fixed intercept. Using the adjusted LD-scores in (S11), we have that

$$\mathbb{E}[u_j^2 \mid \hat{\ell}_j] \approx h^2 \frac{n}{m} \left( \hat{\ell}_j - \frac{m - \hat{\ell}_j}{n-1} \right) + 1 = h^2 \left[ \frac{n}{m} \hat{\ell}_j \left( 1 + \frac{1}{n-1} \right) - \frac{n}{n-1} \right] + 1,$$

yielding (35) for large  $n$ .  $\square$

DERIVATION OF THE LDSC REGRESSION EQUIVALENCE (38). From (37), note that  $\overline{u^2} = \sum_{j=1}^m u_j^2/m = s^2$  by (20) and

$$\bar{\ell} = \frac{1}{m} \sum_{j=1}^m \left( \frac{n}{m} \hat{\ell}_j - 1 \right) = \frac{n}{m} \left[ \frac{1}{m} \text{tr}(\tilde{\mathbf{S}}^2) \right] - 1 = \frac{n}{m} \left( \hat{\mu}_2 + \frac{m-1}{n-1} \right) - 1 = \frac{n}{m} \hat{\mu}_2 + O\left(\frac{1}{n}\right)$$

by (21), assuming that  $m/n$  converges to a constant. Replacing in (37) and comparing to (19), we obtain that

$$\hat{h}_{\text{LD}}^2 = \frac{\overline{u^2} - 1}{\bar{\ell}} = \frac{m(s^2 - 1)}{n\hat{\mu}_2} + O\left(\frac{1}{n}\right) = \hat{h}_{\text{GWASH}}^2 + O\left(\frac{1}{n}\right),$$

yielding (38).  $\square$

**References.**

DICKER, L. H. (2014). Variance estimation in high-dimensional linear models. *Biometrika* **101** 269-284.

DIVISION OF BIostatISTICS  
UNIVERSITY OF CALIFORNIA, SAN DIEGO  
LA JOLLA, CA  
E-MAIL: [armins@ucsd.edu](mailto:armins@ucsd.edu)  
[wes.stat@gmail.com](mailto:wes.stat@gmail.com)

DEPARTMENT OF PSYCHIATRY  
UNIVERSITY OF CALIFORNIA, SAN DIEGO  
LA JOLLA, CA  
E-MAIL: [rzablocki@ucsd.edu](mailto:rzablocki@ucsd.edu)

INSTITUTE OF BIOLOGICAL PSYCHIATRY  
MENTAL HEALTH CENTER ST. HANS  
MENTAL HEALTH SERVICES COPENHAGEN  
ROSKILDE, DENMARK  
E-MAIL: [Andrew.Schork@regionh.dk](mailto:Andrew.Schork@regionh.dk)
